# Supplementary material for: Tear Fluid Biomarkers and Quality of Life in People with Type 2 Diabetes and Dry Eye Disease
Source: MDPI journal article supplement (doi:10.3390/metabo13060733), 2023-06-08
Supplement: s1 [file s1]

**Table S1.** Relationships of biomarkers and ocular surface parameters in the DED-only group.  $r_s$  and  $p$  values are shown, as well as the clinical interpretation of these correlations. A  $p$  value of  $\leq 0.05$  was considered statistically significant. Due to there being a total of 17 subjects in the DED-only group, an  $r_s$  of  $> 0.46$  is considered as a positive correlation and  $< -0.46$  is considered as a negative correlation [47, 48].

| Biomarkers    | TER   |            |                                  | fTBUT  |            |                | CFS    |            |                | Schirmer 1 |            |                                            |
|---------------|-------|------------|----------------------------------|--------|------------|----------------|--------|------------|----------------|------------|------------|--------------------------------------------|
|               | $r_s$ | $p$ -value | Interpretation                   | $r_s$  | $p$ -value | Interpretation | $r_s$  | $p$ -value | Interpretation | $r_s$      | $p$ -value | Interpretation                             |
| IL-1RA        | -0.1  | 0.7        | N/A                              | -0.4   | 0.1        | N/A            | 0.1    | 0.6        | N/A            | -0.2       | 0.4        | N/A                                        |
| IL-8          | 0.2   | 0.5        | N/A                              | -0.02  | 0.9        | N/A            | 0.1    | 0.6        | N/A            | -0.05      | 0.8        | N/A                                        |
| EGF           | -0.5  | 0.05       | $\uparrow$ TER $\downarrow$ EGF  | 0.1    | 0.6        | N/A            | -0.4   | 0.2        | N/A            | -0.03      | 0.9        | N/A                                        |
| Fractalkine   | 0.1   | 0.7        | N/A                              | -0.2   | 0.4        | N/A            | 0.2    | 0.5        | N/A            | 0.02       | 0.9        | N/A                                        |
| IL-10         | 0.08  | 0.8        | N/A                              | 0.1    | 0.6        | N/A            | -0.02  | 0.9        | N/A            | 0.08       | 0.7        | N/A                                        |
| IL-1 $\beta$  | 0.3   | 0.3        | N/A                              | -0.008 | 0.9        | N/A            | 0.07   | 0.8        | N/A            | 0.09       | 0.7        | N/A                                        |
| IL-6          | 0.6   | 0.02       | $\uparrow$ TER $\uparrow$ IL-6   | -0.02  | 0.9        | N/A            | -0.008 | 0.9        | N/A            | -0.5       | 0.05       | $\downarrow$ Schirmer $\uparrow$ IL-6      |
| IP-10         | 0.09  | 0.7        | N/A                              | -0.2   | 0.4        | N/A            | 0.3    | 0.2        | N/A            | -0.1       | 0.6        | N/A                                        |
| MCP-1         | -0.4  | 0.2        | N/A                              | -0.2   | 0.5        | N/A            | 0.09   | 0.7        | N/A            | 0.08       | 0.8        | N/A                                        |
| TNF- $\alpha$ | 0.02  | 0.9        | N/A                              | -0.2   | 0.4        | N/A            | 0.1    | 0.6        | N/A            | -0.3       | 0.2        | N/A                                        |
| VEGF          | -0.4  | 0.09       | N/A                              | 0.3    | 0.3        | N/A            | -0.2   | 0.5        | N/A            | 0.2        | 0.5        | N/A                                        |
| Leptin        | 0.5   | 0.02       | $\uparrow$ TER $\uparrow$ Leptin | -0.1   | 0.7        | N/A            | 0.2    | 0.3        | N/A            | -0.5       | 0.03       | $\downarrow$ Schirmer<br>$\uparrow$ Leptin |
| Insulin       | -0.1  | 0.7        | N/A                              | -0.3   | 0.3        | N/A            | 0.04   | 0.9        | N/A            | -0.4       | 0.2        | N/A                                        |

**Key words:** TER, tear evaporation rate; fTBUT, fluorescein tear break-up time; CFS, corneal fluorescein staining;  $r_s$ , Spearman correlation coefficient; N/A, not applicable.

*Note:* Statistically significant differences and their clinical interpretation are reported in *italics*.

**Table S2.** Relationships of biomarkers and ocular surface parameters in the T2D+DED group.  $r_s$  and  $p$  values are shown, as well as the clinical interpretation of these relationships. A  $p$  value of  $\leq 0.05$  is considered as statistically significant. Due to there being a total of 47 subjects in the T2D+DED group, an  $r_s$  of  $> 0.27$  is considered as a positive relationship and  $< -0.27$  is considered as a negative relationship [47, 48].

| Biomarkers    | TER    |            |                    | fTBUT  |            |                | CFS   |            |                | Schirmer 1 test |            |                   |
|---------------|--------|------------|--------------------|--------|------------|----------------|-------|------------|----------------|-----------------|------------|-------------------|
|               | $r_s$  | $p$ -value | Interpretation     | $r_s$  | $p$ -value | Interpretation | $r_s$ | $p$ -value | Interpretation | $r_s$           | $p$ -value | Interpretation    |
| IL-1RA        | -0.1   | 0.4        | N/A                | -0.3   | 0.04       | ↓fTBUT ↑IL-1RA | 0.2   | 0.1        | N/A            | -0.5            | <0.001     | ↓Schirmer ↑IL-1RA |
| IL-8          | 0.2    | 0.1        | N/A                | -0.2   | 0.2        | N/A            | 0.3   | 0.04       | ↑CFS ↑IL-8     | -0.1            | 0.4        | N/A               |
| EGF           | 0.1    | 0.3        | N/A                | -0.05  | 0.7        | N/A            | -0.03 | 0.8        | N/A            | -0.06           | 0.7        | N/A               |
| Fractalkine   | -0.1   | 0.5        | N/A                | -0.001 | 0.9        | N/A            | 0.01  | 0.9        | N/A            | -0.1            | 0.4        | N/A               |
| IL-10         | -0.3   | 0.05       | ↑TER ↓IL-10        | 0.2    | 0.1        | N/A            | -0.08 | 0.6        | N/A            | 0.02            | 0.9        | N/A               |
| IL-1 $\beta$  | -0.3   | 0.02       | ↑TER ↓IL-1 $\beta$ | 0.1    | 0.3        | N/A            | 0.1   | 0.5        | N/A            | -0.01           | 0.9        | N/A               |
| IL-6          | 0.03   | 0.9        | N/A                | -0.3   | 0.05       | ↓fTBUT ↑IL-6   | 0.3   | 0.02       | ↑CFS ↑IL-6     | -0.3            | 0.08       | N/A               |
| IP-10         | -0.03  | 0.9        | N/A                | -0.06  | 0.7        | N/A            | -0.2  | 0.1        | N/A            | -0.1            | 0.4        | N/A               |
| MCP-1         | 0.006  | 0.9        | N/A                | -0.2   | 0.3        | N/A            | 0.3   | 0.03       | ↑CFS ↑MCP-1    | -0.3            | 0.03       | ↓Schirmer ↑MCP-1  |
| TNF- $\alpha$ | -0.2   | 0.3        | N/A                | -0.1   | 0.4        | N/A            | -0.08 | 0.6        | N/A            | -0.08           | 0.6        | N/A               |
| VEGF          | 0.09   | 0.5        | N/A                | -0.2   | 0.1        | N/A            | 0.04  | 0.8        | N/A            | 0.02            | 0.9        | N/A               |
| Leptin        | -0.007 | 0.9        | N/A                | 0.02   | 0.9        | N/A            | 0.2   | 0.2        | N/A            | -0.04           | 0.8        | N/A               |
| Insulin       | 0.2    | 0.09       | N/A                | 0.08   | 0.6        | N/A            | 0.008 | 0.9        | N/A            | 0.04            | 0.8        | N/A               |

**Key words:** TER, tear evaporation rate; fTBUT, fluorescein tear break-up time; CFS, corneal fluorescein staining;  $r_s$ , Spearman correlation coefficient; N/A, not applicable.

*Note:* Statistically significant differences and their clinical interpretation are reported in *italics*.

**Table S3.** Relationships of biomarkers and symptoms of DED in the DED-only group.  $r_s$  and  $p$  values are shown, as well as the clinical interpretation of these correlations. A  $p$  value of  $\leq 0.05$  was considered statistically significant. Due to there being a total of 17 subjects in the DED-only group, an  $r_s$  of  $> 0.46$  is considered as a positive correlation and  $< -0.46$  is considered as a negative correlation [47, 48].

| Biomarkers    | DEQS scores (0-100) |             |                                          | OSDI scores (0-100) |             |                                 |
|---------------|---------------------|-------------|------------------------------------------|---------------------|-------------|---------------------------------|
|               | $r_s$               | $p$ -value  | Interpretation                           | $r_s$               | $p$ -value  | Interpretation                  |
| IL-1RA        | 0.17                | 0.52        | N/A                                      | 0.17                | 0.51        | N/A                             |
| IL-8          | 0.31                | 0.23        | N/A                                      | 0.18                | 0.48        | N/A                             |
| EGF           | 0.12                | 0.64        | N/A                                      | 0.17                | 0.5         | N/A                             |
| Fractalkine   | 0.38                | 0.13        | N/A                                      | 0.28                | 0.28        | N/A                             |
| IL-10         | 0.38                | 0.14        | N/A                                      | 0.31                | 0.23        | N/A                             |
| IL-1 $\beta$  | 0.2                 | 0.44        | N/A                                      | 0.02                | 0.94        | N/A                             |
| IL-6          | -0.13               | 0.62        | N/A                                      | -0.42               | 0.09        | N/A                             |
| IP-10         | <i>0.57</i>         | <i>0.02</i> | $\uparrow$ DEQS $\uparrow$ IP-10         | 0.24                | 0.36        | N/A                             |
| MCP-1         | -0.21               | 0.41        | N/A                                      | 0.08                | 0.76        | N/A                             |
| TNF- $\alpha$ | <i>0.49</i>         | <i>0.04</i> | $\uparrow$ DEQS $\uparrow$ TNF- $\alpha$ | 0.1                 | 0.7         | N/A                             |
| VEGF          | <i>0.49</i>         | <i>0.05</i> | $\uparrow$ DEQS $\uparrow$ VEGF          | <i>0.47</i>         | <i>0.06</i> | $\uparrow$ OSDI $\uparrow$ VEGF |
| Leptin        | -0.14               | 0.58        | N/A                                      | -0.46               | 0.06        | N/A                             |
| Insulin       | 0.21                | 0.41        | N/A                                      | 0.09                | 0.74        | N/A                             |

**Key words:** T2D, type 2 diabetes; DED, Dry Eye Disease;  $r_s$ , Spearman correlation coefficient; N/A, not applicable.

*Note:* Statistically significant differences and their clinical interpretation are reported in *italics*.

**Table S4.** Relationships of biomarkers and symptoms of DED in the T2D+DED group.  $r_s$  and  $p$  values are shown, as well as the clinical interpretation of these relationships. A  $p$  value of  $\leq 0.05$  is considered as statistically significant. Due to there being a total of 47 subjects in the T2D+DED group, an  $r_s$  of  $> 0.27$  is considered as a positive relationship and  $< -0.27$  is considered as a negative relationship [47, 48].

| Biomarkers    | DEQS scores (0-100) |            |                | OSDI scores (0-100) |            |                |
|---------------|---------------------|------------|----------------|---------------------|------------|----------------|
|               | $r_s$               | $p$ -value | Interpretation | $r_s$               | $p$ -value | Interpretation |
| IL-1RA        | 0.08                | 0.6        | N/A            | 0.02                | 0.88       | N/A            |
| IL-8          | 0.11                | 0.47       | N/A            | 0.07                | 0.66       | N/A            |
| EGF           | -0.14               | 0.35       | N/A            | -0.001              | 0.99       | N/A            |
| Fractalkine   | -0.15               | 0.31       | N/A            | -0.03               | 0.84       | N/A            |
| IL-10         | 0.09                | 0.56       | N/A            | 0.14                | 0.34       | N/A            |
| IL-1 $\beta$  | 0.2                 | 0.17       | N/A            | 0.14                | 0.34       | N/A            |
| IL-6          | 0.07                | 0.64       | N/A            | 0.17                | 0.25       | N/A            |
| IP-10         | 0.13                | 0.4        | N/A            | 0.09                | 0.54       | N/A            |
| MCP-1         | -0.13               | 0.4        | N/A            | 0.10                | 0.52       | N/A            |
| TNF- $\alpha$ | 0.23                | 0.11       | N/A            | 0.13                | 0.4        | N/A            |
| VEGF          | -0.03               | 0.86       | N/A            | 0.05                | 0.72       | N/A            |
| Leptin        | 0.22                | 0.14       | N/A            | 0.21                | 0.15       | N/A            |
| Insulin       | 0.07                | 0.62       | N/A            | 0.03                | 0.86       | N/A            |

**Key words:** T2D, type 2 diabetes; DED, Dry Eye Disease;  $r_s$ , Spearman correlation coefficient; N/A, not applicable.

**Table S5.** Relationships of biomarkers and clinical data of T2D in the T2D+DED group.  $r_s$  and  $p$  values are shown, as well as the clinical interpretation of these relationships. A  $p$  value of  $\leq 0.05$  is considered as statistically significant. Due to there being a total of 47 subjects in the T2D+DED group, an  $r_s$  of  $> 0.27$  is considered as a positive relationship and  $< -0.27$  is considered as a negative relationship [47, 48].

| Biomarkers    | Duration of T2D |            |                                                    | HbA <sub>1c</sub> |            |                | Total Cholesterol |            |                | HDL    |            |                                     |
|---------------|-----------------|------------|----------------------------------------------------|-------------------|------------|----------------|-------------------|------------|----------------|--------|------------|-------------------------------------|
|               | $r_s$           | $p$ -value | Interpretation                                     | $r_s$             | $p$ -value | Interpretation | $r_s$             | $p$ -value | Interpretation | $r_s$  | $p$ -value | Interpretation                      |
| IL-1RA        | -0.16           | 0.3        | N/A                                                | -0.21             | 0.16       | N/A            | 0.18              | 0.23       | N/A            | -0.07  | 0.64       | N/A                                 |
| IL-8          | -0.22           | 0.13       | N/A                                                | 0.06              | 0.68       | N/A            | -0.03             | 0.86       | N/A            | -0.23  | 0.12       | N/A                                 |
| EGF           | -0.19           | 0.19       | N/A                                                | -0.13             | 0.37       | N/A            | 0.06              | 0.7        | N/A            | -0.005 | 0.97       | N/A                                 |
| Fractalkine   | -0.12           | 0.44       | N/A                                                | -0.08             | 0.6        | N/A            | 0.24              | 0.1        | N/A            | 0.03   | 0.86       | N/A                                 |
| IL-10         | 0.17            | 0.27       | N/A                                                | 0.02              | 0.89       | N/A            | -0.09             | 0.54       | N/A            | -0.17  | 0.27       | N/A                                 |
| IL-1 $\beta$  | 0.06            | 0.68       | N/A                                                | 0.11              | 0.45       | N/A            | -0.24             | 0.11       | N/A            | -0.07  | 0.63       | N/A                                 |
| IL-6          | -0.05           | 0.75       | N/A                                                | 0.04              | 0.81       | N/A            | 0.06              | 0.71       | N/A            | -0.04  | 0.8        | N/A                                 |
| IP-10         | -0.08           | 0.62       | N/A                                                | 0.005             | 0.97       | N/A            | 0.12              | 0.44       | N/A            | -0.18  | 0.23       | N/A                                 |
| MCP-1         | -0.03           | 0.86       | N/A                                                | -0.02             | 0.92       | N/A            | -0.26             | 0.08       | N/A            | -0.21  | 0.15       | N/A                                 |
| TNF- $\alpha$ | -0.11           | 0.46       | N/A                                                | 0.21              | 0.15       | N/A            | -0.002            | 0.99       | N/A            | -0.17  | 0.26       | N/A                                 |
| VEGF          | -0.3            | 0.04       | $\uparrow$ Duration of T2D<br>$\downarrow$ VEGF    | 0.1               | 0.5        | N/A            | 0.19              | 0.19       | N/A            | 0.009  | 0.95       | N/A                                 |
| Leptin        | 0.12            | 0.41       | N/A                                                | 0.01              | 0.95       | N/A            | -0.14             | 0.34       | N/A            | -0.23  | 0.11       | N/A                                 |
| Insulin       | -0.31           | 0.03       | $\uparrow$ Duration of T2D<br>$\downarrow$ Insulin | -0.19             | 0.21       | N/A            | -0.03             | 0.87       | N/A            | -0.39  | 0.007      | $\uparrow$ HDL $\downarrow$ Insulin |

**Key words:** T2D, type 2 diabetes; HbA<sub>1c</sub>, glycated haemoglobin; HDL, high density lipoprotein;  $r_s$ , Spearman correlation coefficient; N/A, not applicable.

*Note:* Statistically significant differences and their clinical interpretation are reported in *italics*.
